# Supplementary material for: A facile graphene oxide based sensor for electrochemical detection of prostate anti-cancer (anti-testosterone) drug flutamide in biological samples
Source: Royal Society of Chemistry journal article supplement (doi:10.1039/c6ra28792a), 2017-01-01
Supplement: c6ra28792a1.pdf [file c6ra28792a1.pdf]

**A facile graphene oxide based sensor for electrochemical detection of prostate anti-cancer (anti-testosterone) drug flutamide in biological samples**

**R. Karthik<sup>1</sup>, M. Govindasamy<sup>1</sup>, Shen-Ming Chen<sup>1\*</sup>, Tse-Wei Chen<sup>1</sup>, J. Vinoth kumar<sup>2</sup>, A. Elangovan<sup>3</sup>, V. Muthuraj<sup>2</sup>, Ming-Chin Yu<sup>4\*</sup>**

<sup>1</sup>Electroanalysis and Bioelectrochemistry Lab, Department of Chemical Engineering and Biotechnology, National Taipei University of Technology, No.1, Section 3, Chung-Hsiao East Road, Taipei, 106, Taiwan, ROC

<sup>2</sup>Department of Chemistry, VHNSN College, Virudhunagar - 626001, India.

<sup>3</sup>Department of Chemistry, Thiagarajar College, Madurai - 625009, India.

<sup>4</sup>Department of General Surgery, Chang Gung Memorial Hospital at Linkou, Taoyuan, Taiwan; No. 5, Fu-Hsing Street, Kweishan, Taoyuan, 333, Taiwan

Corresponding author:

Email: [smchen78@ms15.hinet.net](mailto:smchen78@ms15.hinet.net) (S-M. Chen),

Tel: +886 2270 17147,

Fax: +886 2270 25238

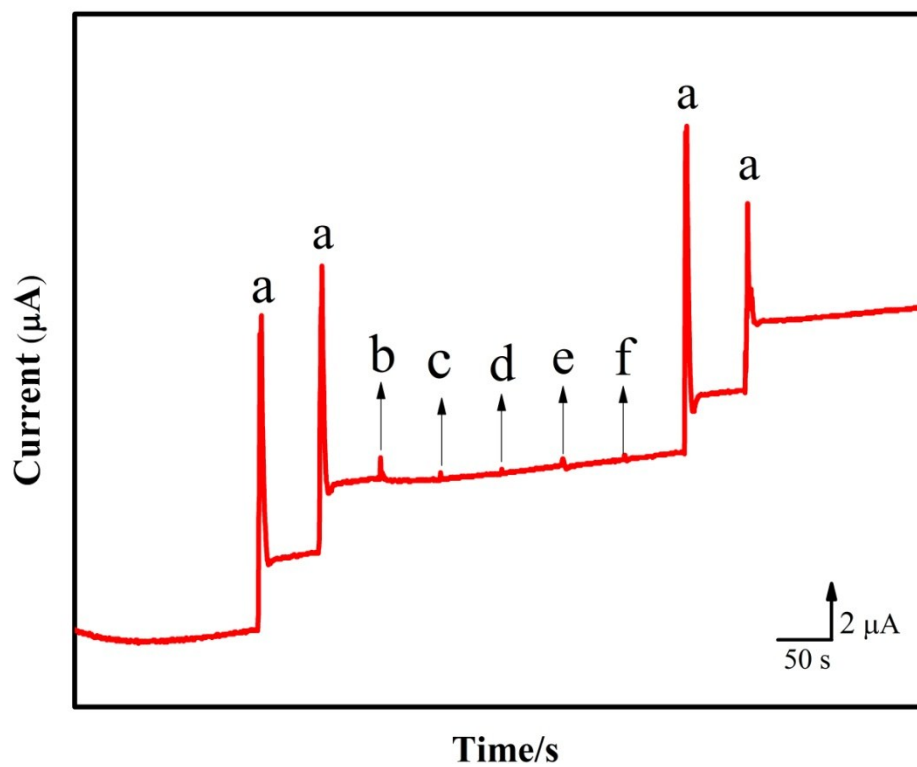

**Fig.S1.** Amperometric (*i-t*) response at GO/RDE in addition of 6  $\mu\text{M}$  flutamide (a), and 30 fold excess concentrations of biological compounds uric acid (b), glucose (c), ascorbic acid (d), dopamine (e), and catachol (f) containing continuously stirred 0.05M PB solution (pH 7); rotation speed 1200 rpm; applied potential ( $E_{\text{app}}$ ) = -0.52 V.

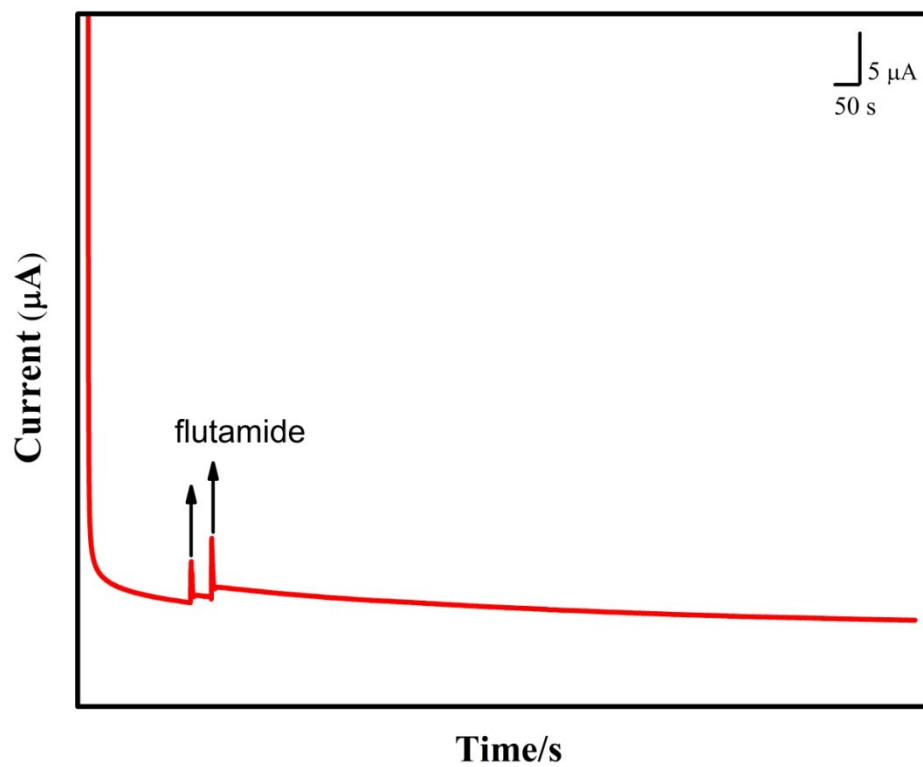

**Fig.S2** Steady-state response observed at GO/RDE flutamide sensors for the addition of 6  $\mu\text{M}$  flutamide in 0.05 M PB (pH 7) up to 2000 s; applied potential =  $-0.52\text{ V}$ ; rotation speed = 1200 rpm.

**Table S1** Comparison of the major characteristic of the different methods used in the determination of anti-cancer drug flutamide

| Electrodes                                                                 | Linear range<br>( $\mu\text{M}$ ) | Limit of detection<br>( $\mu\text{M}$ )       | Sensitivity<br>( $\mu\text{A } \mu\text{M}^{-1}\text{cm}^{-2}$ ) | Ref       |
|----------------------------------------------------------------------------|-----------------------------------|-----------------------------------------------|------------------------------------------------------------------|-----------|
| silver nanoparticles (EM) <sup>a</sup>                                     | 10–1000                           | 9.33                                          | -                                                                | 40        |
| Ag/Au alloy nanoparticles (CL) <sup>b</sup>                                | 0.5 - 100                         | 0.012                                         | -                                                                | 41        |
| Fe <sup>3+</sup> and 1,10-phenanthroline<br>(SP) <sup>c</sup>              | 0.5–10                            | 0.332                                         | -                                                                | 42        |
| CTAB/CPE                                                                   | 20-160 (ppm)                      | 50 ppb                                        | -                                                                | 43        |
| Hanging mercury drop electrode                                             | -                                 | 0.19 (bulk)<br>0.08 (tablet)<br>0.009 (serum) | -<br>-<br>-                                                      | 44        |
| Square wave cathodic adsorptive<br>stripping voltammetric/PGE <sup>a</sup> | -                                 | 0.015                                         | -                                                                | 45        |
| Graphene oxide/GCE                                                         | 0.009 -1.9                        | 0.006                                         | 29.55                                                            | This work |

**Abbreviation:** Electrochemical method<sup>a</sup>, Chemiluminescence<sup>b</sup>, spectrophotometric method <sup>c</sup>, PEG-Pencil graphite electrode, CTAB- cetyltrimethylammonium bromide, CPE-Carbon paste electrode

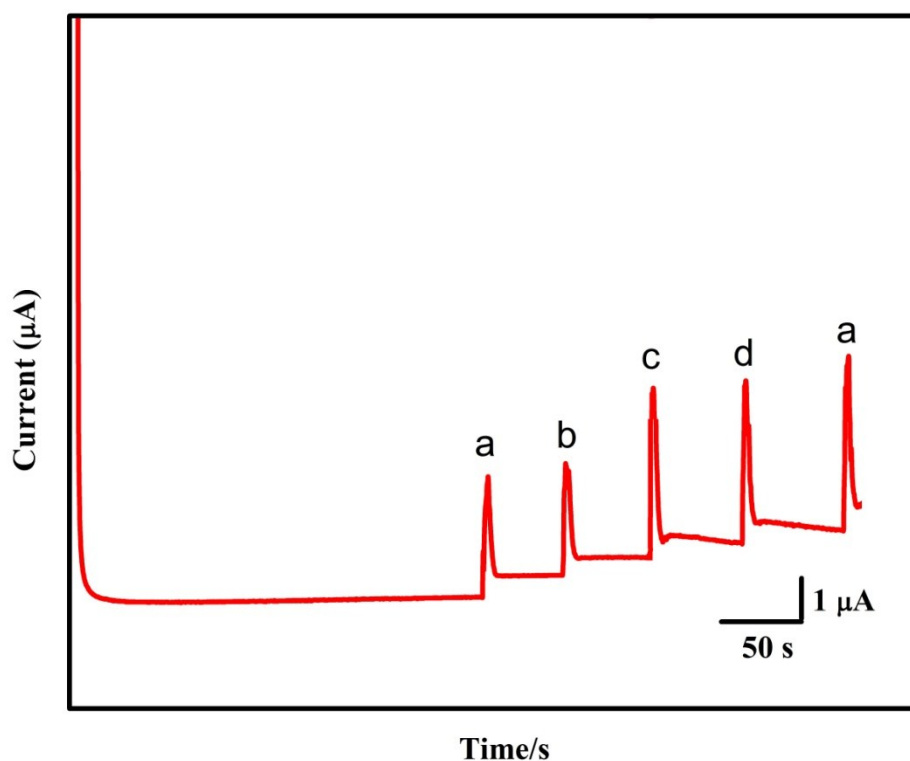

**Fig.S3.** Amperometric (*i-t*) response at GO modified RDE in addition of 6  $\mu\text{M}$  flutamide (a) human serum (b) rat kidney (c) rat brain serum sample (d) containing continuously stirred 0.05M PB solution (pH 7); rotation speed 1200 rpm. Applied potential ( $E_{\text{app}}$ ) = -0.52 V.

**Table S2** The recoveries for the determination of flutamide in human, rat kidney and brain serum samples

| Real sample      | Add ( $\mu\text{M}$ ) | Found ( $\mu\text{M}$ ) | Recovery (%) |
|------------------|-----------------------|-------------------------|--------------|
| Human serum      | 3                     | 2.97                    | 99.0         |
| Rat kidney serum | 3                     | 2.96                    | 98.6         |
| Rat brain serum  | 3                     | 2.99                    | 99.6         |
